# Supplementary material for: Bimetallic Ag3Cu porous networks for ambient electrolysis of nitrogen to ammonia
Source: Royal Society of Chemistry journal article supplement (doi:10.1039/c9ta03297e), 2019-01-01
Supplement: c9ta03297e1.pdf [file c9ta03297e1.pdf]

Electronic Supplementary Information for

# **Bimetallic Ag<sub>3</sub>Cu porous networks for ambient electrolysis of nitrogen to ammonia**

Hongjie Yu, Ziqiang Wang,\* Dandan Yang, Xiaoqian Qian, You Xu, Xiaonian Li,

Hongjing Wang\* and Liang Wang\*

State Key Laboratory Breeding Base of Green-Chemical Synthesis Technology, College of  
Chemical Engineering, Zhejiang University of Technology, Hangzhou 310014, P. R. China

\*Corresponding authors' E-mails: zqwang@zjut.edu.cn; hjw@zjut.edu.cn; wangliang@zjut.edu.cn

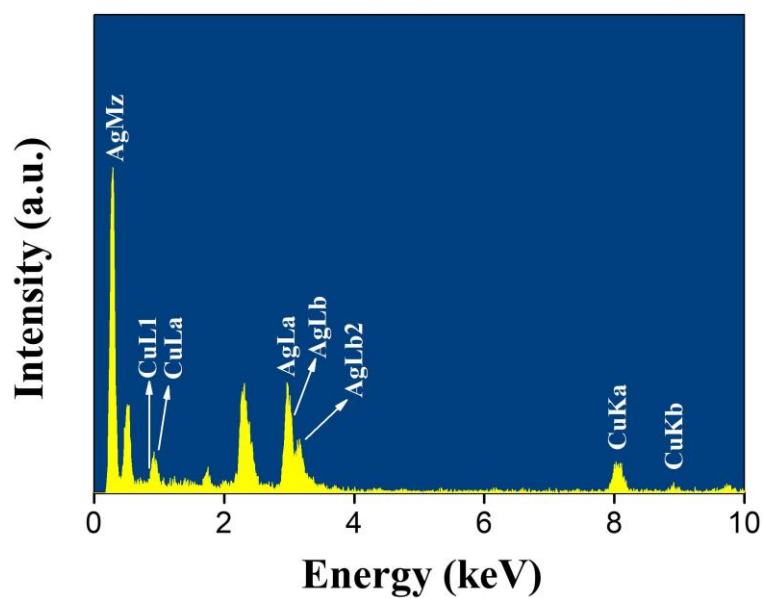

**Fig. S1** EDX spectrum of the  $\text{Ag}_3\text{Cu}$  BPNs.

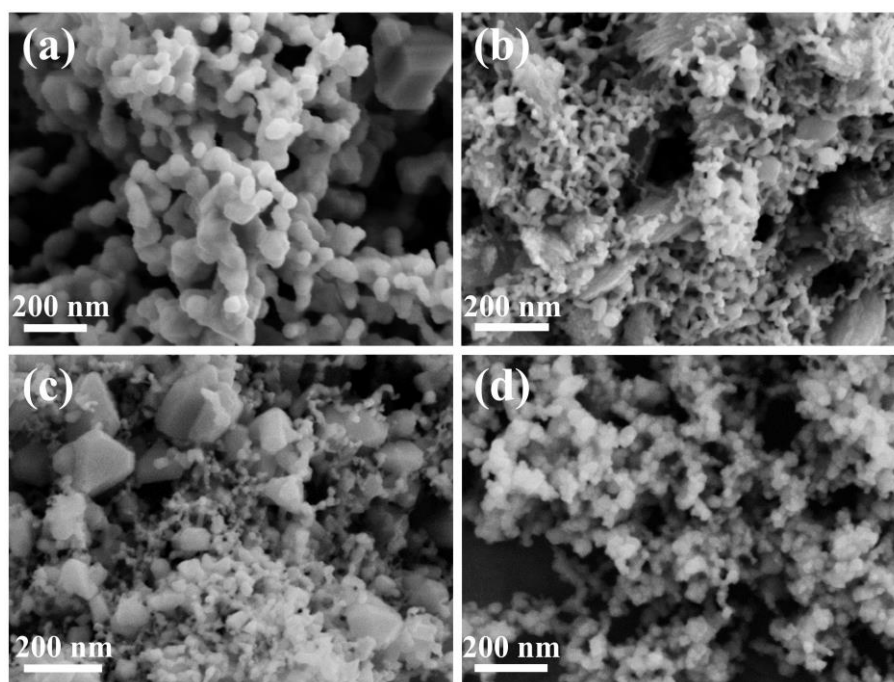

**Fig. S2** SEM images of the (a) Ag, (b) AgCu, (c) AgCu<sub>3</sub>, and (d) Cu nanostructures prepared under the typical synthesis condition.

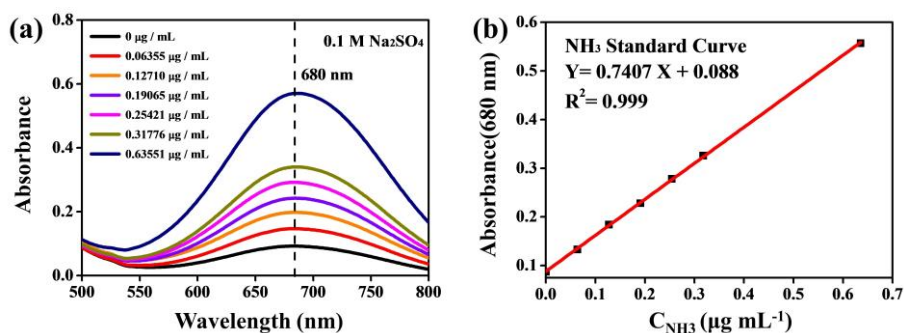

**Fig. S3** (a) UV-vis curves of indophenol assays with  $\text{NH}_4^+$  ions after incubating for 1 h at room temperature; (b) calibration curve used for estimation of  $\text{NH}_3$  by  $\text{NH}_4^+$  ion concentration. The absorbance at 680 nm was measured by UV-vis spectrophotometer, and the fitting curve shows good linear relation of absorbance with  $\text{NH}_4^+$  ion concentration ( $Y = 0.7407X + 0.088$ ,  $R^2 = 0.999$ ) of three times independent calibration curves.

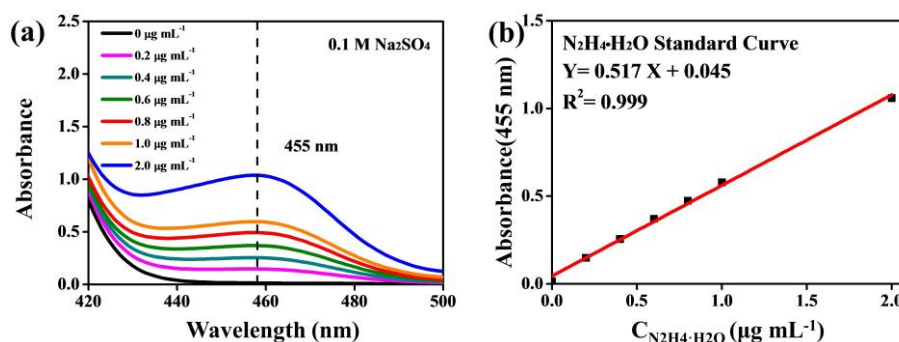

**Fig. S4** (a) UV-vis curves of various  $\text{N}_2\text{H}_4 \cdot \text{H}_2\text{O}$  concentration after incubating for 15 min at room temperature; (b) calibration curve used for estimation of  $\text{N}_2\text{H}_4 \cdot \text{H}_2\text{O}$  concentration. The absorbance at 455 nm was measured by UV-vis spectrophotometer, and the fitting curve shows good linear relation of absorbance with  $\text{N}_2\text{H}_4 \cdot \text{H}_2\text{O}$  concentration ( $Y = 0.517X + 0.045$ ,  $R^2 = 0.999$ ) of three times independent calibration curves.

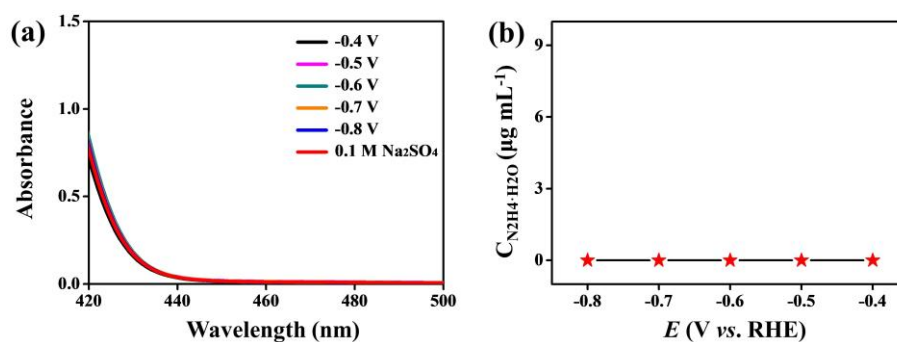

**Fig. S5** The UV-vis absorption spectra and corresponding yield of N<sub>2</sub>H<sub>4</sub> at selected potentials.

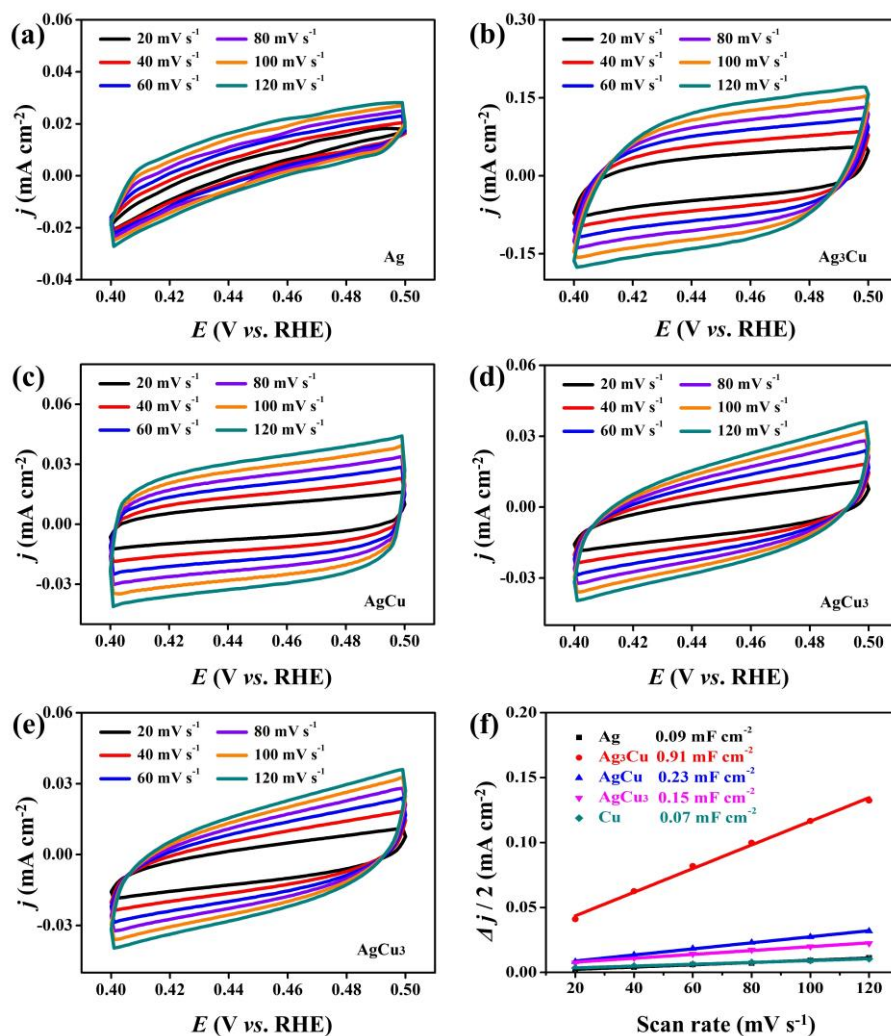

**Fig. S6** (a-e) Cyclic voltammograms and (f) capacitive current densities at 0.45 V derived from CV curves against scan rate for different samples.

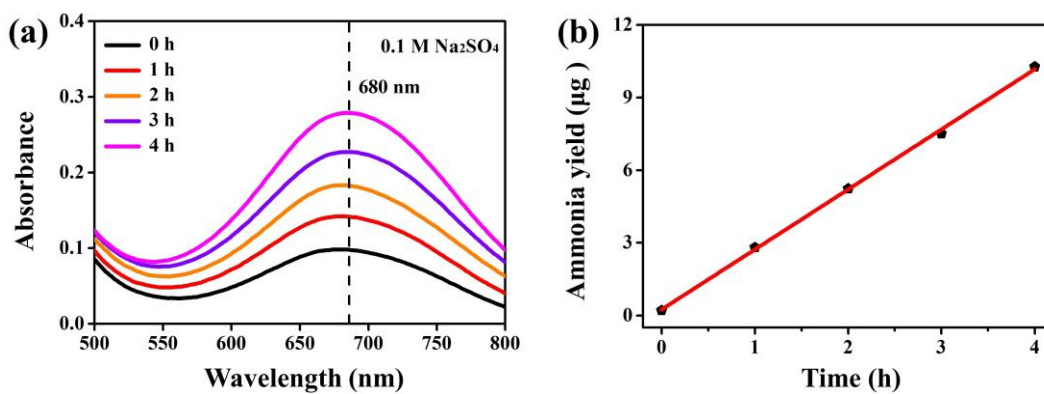

**Fig. S7** (a) UV-vis absorption spectra of the electrolytes after electrolysis for different times, and (b) the relationship between the amount of ammonia formation and the electrolysis time.

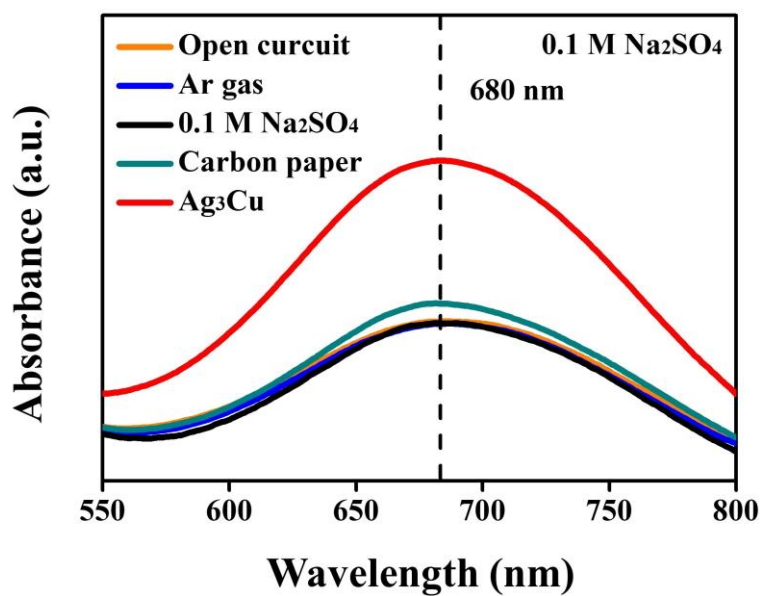

**Fig. S8** UV-vis absorption spectra of the electrolytes stained with indophenols indicator under different conditions.

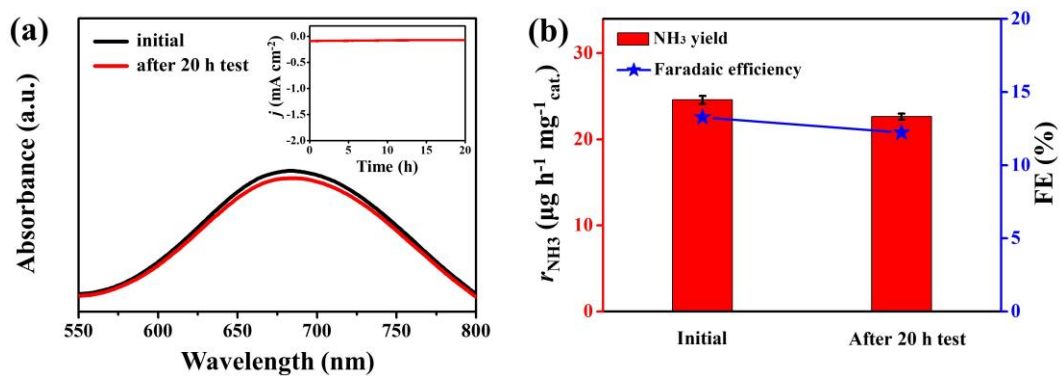

**Fig. S9** (a) The long-term stability test of the Ag<sub>3</sub>Cu BPNs for 20 h and corresponding UV-vis absorption spectra of the electrolytes before and after electrolysis. (b) the comparison of NRR performance before and after electrolysis.

**Table S1.** Summary of the representative catalysts on electrocatalytic NRR at ambient conditions.

| Catalysts                                | Electrolyte                               | NH <sub>3</sub> yield rate                                                                                                             | FE(%)        | Ref.             |
|------------------------------------------|-------------------------------------------|----------------------------------------------------------------------------------------------------------------------------------------|--------------|------------------|
| <b>Ag<sub>3</sub>Cu BPNs</b>             | <b>0.1 M Na<sub>2</sub>SO<sub>4</sub></b> | <b>24.59 <math>\mu\text{g h}^{-1} \text{mg}^{-1}_{\text{cat}}</math></b><br><b>9.84 <math>\mu\text{g h}^{-1} \text{cm}^{-2}</math></b> | <b>13.28</b> | <b>This work</b> |
| Porous bromide derived Ag film           | 0.1 M Na <sub>2</sub> SO <sub>4</sub>     | 1.27 $\mu\text{g h}^{-1} \text{cm}^{-2}$                                                                                               | 7.36         | [1]              |
| Ag nanosheets                            | 0.1 M HCl                                 | 2.83 $\mu\text{g h}^{-1} \text{cm}^{-2}$                                                                                               | 4.8          | [2]              |
| Pd <sub>0.2</sub> Cu <sub>0.8</sub> /rGO | 0.1 M KOH                                 | 2.80 $\mu\text{g h}^{-1} \text{mg}^{-1}_{\text{cat}}$                                                                                  | ~0.6         | [3]              |
| Porous PdRu                              | 0.1 M Na <sub>2</sub> SO <sub>4</sub>     | 25.92 $\mu\text{g h}^{-1} \text{mg}^{-1}_{\text{cat}}$                                                                                 | 1.53         | [4]              |
| Fe <sub>2</sub> O <sub>3</sub> nanorods  | 0.1 M Na <sub>2</sub> SO <sub>4</sub>     | 15.9 $\mu\text{g h}^{-1} \text{mg}^{-1}_{\text{cat}}$                                                                                  | 0.94         | [5]              |
| TiO <sub>2</sub> -rGO                    | 0.1 M Na <sub>2</sub> SO <sub>4</sub>     | 15.13 $\mu\text{g h}^{-1} \text{mg}^{-1}_{\text{cat}}$                                                                                 | 3.3          | [6]              |
| pAu/NF                                   | 0.1 M Na <sub>2</sub> SO <sub>4</sub>     | 9.42 $\mu\text{g h}^{-1} \text{cm}^{-2}$                                                                                               | 13.36        | [7]              |
| TiO <sub>2</sub>                         | 0.1 M Na <sub>2</sub> SO <sub>4</sub>     | 5.61 $\mu\text{g h}^{-1} \text{cm}^{-2}$                                                                                               | 2.5          | [8]              |
| MoS <sub>2</sub> /CC                     | 0.1 M Na <sub>2</sub> SO <sub>4</sub>     | 4.94 $\mu\text{g h}^{-1} \text{cm}^{-2}$                                                                                               | 1.17         | [9]              |
| Au HNCs                                  | 0.5 M LiClO <sub>4</sub>                  | 3.90 $\mu\text{g h}^{-1} \text{cm}^{-2}$                                                                                               | 30.2         | [10]             |
| Fe <sub>3</sub> O <sub>4</sub> /Ti       | 0.1 M Na <sub>2</sub> SO <sub>4</sub>     | 3.43 $\mu\text{g h}^{-1} \text{cm}^{-2}$                                                                                               | 2.6          | [11]             |
| Fe <sub>2</sub> O <sub>3</sub> -CNT      | diluted KHCO <sub>3</sub>                 | 0.22 $\mu\text{g h}^{-1} \text{cm}^{-2}$                                                                                               | 0.15         | [12]             |
| Fe/Fe <sub>3</sub> O <sub>4</sub>        | 0.1 M PBS                                 | 0.19 $\mu\text{g h}^{-1} \text{cm}^{-2}$                                                                                               | 8.29         | [13]             |

## References

- [1] L. Ji, X. F. Shi, A. M. Asiri, B. Z. Zheng and X. P. Sun, *Inorg. Chem.*, 2018, **57**, 14692–14697.
- [2] H. H. Huang, L. Xia, X. F. Shi, A. M. Asiri and X. P. Sun, *Chem. Commun.*, 2018, **54**, 11427–11430.
- [3] M. M. Shi, D. Bao, S. J. Li, B. R. Wulan, J. M. Yan and Q. Jiang, *Adv. Energy Mater.*, 2018, **8**, 1800124.
- [4] Z. Q. Wang, C. J. Li, K. Deng, Y. Xu, H. R. Xue, X. N. Li, L. Wang and H. J. Wang, *ACS Sustainable Chem. Eng.*, 2019, **7**, 2400–2405.
- [5] X. J. Xiang, Z. Wang, X. F. Shi, M. K. Fan and X. P. Sun, *ChemCatChem*, 2018, **10**, 4530–4535.
- [6] X. X. Zhang, Q. Liu, X. F. Shi, A. M. Asiri, Y. L. Luo, X. P. Sun and T. S. Li, *J. Mater. Chem. A*, 2018, **6**, 17303–17306.
- [7] H. J. Wang, H. J. Yu, Z. Q. Wang, Y. H. Li, Y. Xu, X. N. Li, H. R. Xue and L. Wang, *Small*, 2019, **15**, 1804769.
- [8] R. Zhang, X. Ren, X. F. Shi, F. Y. Xie, B. Z. Zheng, X. D. Guo and X. P. Sun, *ACS Appl. Mater. Interfaces*, 2018, **10**, 28251–28255.
- [9] L. Zhang, X. Q. Ji, X. Ren, Y. J. Ma, X. F. Shi, Z. Q. Tian, A. M. Asiri, L. Chen, B. Tang and X. P. Sun, *Adv. Mater.*, 2018, **30**, 1800191.
- [10] M. Nazemi, S. R. Panikkanvalappil and M. A. El-Sayed, *Nano Energy*, 2018, **49**, 316–323.
- [11] Q. Liu, X. X. Zhang, B. Zhang, Y. L. Luo, G. W. Cui, F. Y. Xie and X. P. Sun, *Nanoscale*, 2018, **10**, 14386–14389.
- [12] S. Chen, S. Perathoner, C. Ampelli, C. Mebrahtu, D. Su and G. Centi, *Angew. Chem., Int. Ed.*, 2017, **56**, 2699–2703.
- [13] L. Hu, A. Khaniya, J. Wang, G. Chen, W. E. Kaden and X. F. Feng, *ACS Catal.*, 2018, **8**, 9312–9319.
